# Supplementary material for: Multifaceted Empathy Differences in Children and Adults with Autism
Source: Research Square preprint supplement (doi:10.21203/rs.3.rs-496690/v1), 2021-05-13
Supplement: Supplementary file 1 [file c066a5ffc1d0a8f69695c691.docx]

**Supplemental Methods**

### **Bayesian Unequal-variance *t*-tests**

All statistical computations were performed in R (R Core Team, 2020). When comparing continuous variables between autistic and neurotypical groups, we utilized a Bayesian *t*-testsimilar to the BEST procedure proposed by Kruschke (2013). However, a notable difference is that in our model, priors were not dependent on the data, dependent variables were standardized (*M* = 0, *SD* = 1). The standardized outcome was fit to an unequal-variances *t*-test model in the *brms* R package (Bürkner, 2017), with a Normal(0, 1) prior on regression coefficients (i.e., the intercept term, mean difference between groups, and mean difference in log(σ) between groups), a Normal(0, 1) prior on log-transformed standard deviation parameters for each group, and a Gamma(2, 0.1) prior on ν, the degrees of freedom of the *t-*distribution. Posterior distributions of the parameters were based on 40,000 post-warmup MCMC draws from five Markov chains. The primary parameter of interest was the standardized mean difference between groups (i.e., Cohen’s *d*, calculated as the difference in means divided by the square root of the pooled variance), which we summarized using the posterior median and 95% highest-density credible interval (CrI). The Savage-Dickey density ratio (Wagenmakers et al., 2010) was used to calculate a Bayes factor testing the hypothesis that *d* = 0.

### **Bayesian Chi-squared Tests**

Sex was compared between the autistic and neurotypical groups using the Bayesian equivalent of a Chi-squared test, which assessed the hypothesis that the proportion of females in the two groups was equal. The proportions of females in each group were compared using default Gûnel-Dickey Bayes factors for contingency tables (as implemented in the BayesFactor R package; Morey & Rouder, 2018) based on the independent multinomial sampling scheme (Gûnel & Dickey, 1974; Jamil et al., 2017). In this test, the number of individuals in each diagnostic group (autistic and neurotypical) is treated as fixed, and cell counts are multinomially distributed within each row of the contingency table. A Dirichlet prior with parameters is placed on the parameters of each multinomial distribution, and the analytically derived Bayes factor provides evidence for or against the null hypothesis of equivalent distributions between groups. In addition, we calculated the odds ratio (OR) along with its 95% CrI using 15,000 Monte Carlo samples from the joint posterior distribution of the model parameters.

**Supplemental References**

Bürkner, P.-C. (2017). brms: An R package for Bayesian multilevel models using Stan. *Journal of Statistical Software*, *80*(1). https://doi.org/10.18637/jss.v080.i01

Bürkner, P.-C. (2018). Advanced Bayesian multilevel modeling with the R package brms. *The R Journal*, *10*(1), 395–411.

Cohen, J. (1994). The earth is round (p < .05). *American Psychologist*, *49*(12), 997–1003. https://doi.org/10.1037//0003-066x.49.12.997

Dickey, J. M., & Lientz, B. P. (1970). The weighted likelihood ratio, sharp hypotheses about chances, the order of a Markov chain. *The Annals of Mathematical Statistics*, *41*(1), 214–226. https://doi.org/10.1214/aoms/1177697203

Gûnel, E., & Dickey, J. (1974). Bayes factors for independence in contingency tables. *Biometrika*, *61*(3), 545–557. https://doi.org/10.1093/biomet/61.3.545

Jamil, T., Ly, A., Morey, R. D., Love, J., Marsman, M., & Wagenmakers, E.-J. (2017). Default “Gunel and Dickey” Bayes factors for contingency tables. *Behavior Research Methods*, *49*(2), 638–652. https://doi.org/10.3758/s13428-016-0739-8

Kirk, R. E. (1996). Practical significance: A concept whose time has come. *Educational and Psychological Measurement*, *56*(5), 746–759. https://doi.org/10.1177/0013164496056005002

Kruschke, J. K. (2013). Bayesian estimation supersedes the t test. *Journal of Experimental Psychology: General*, *142*(2), 573–603. https://doi.org/10.1037/a0029146

Kruschke, J. K., & Liddell, T. M. (2018). The Bayesian new statistics: Hypothesis testing, estimation, meta-analysis, and power analysis from a Bayesian perspective. *Psychonomic Bulletin & Review*, *25*(1), 178–206. https://doi.org/10.3758/s13423-016-1221-4

Makowski, D., Ben-Shachar, M. S., Chen, S. H. A., & Lüdecke, D. (2019). Indices of effect existence and significance in the Bayesian framework. *Frontiers in Psychology*, *10*. https://doi.org/10.3389/fpsyg.2019.02767

Makowski, D., Ben-Shachar, M. S., & Lüdecke, D. (2019). BayestestR: Describing Effects and their Uncertainty, Existence and Significance within the Bayesian Framework. *Journal of Open Source Software*, *4*(40), 1541. https://doi.org/10.21105/joss.01541

Morey, R. D., & Rouder, J. N. (2018). *BayesFactor: Computation of Bayes Factors for Common Designs*. https://CRAN.R-project.org/package=BayesFactor

R Core Team. (2020). *R: A language and environment for statistical computing* (4.0.2) [Computer software]. R Foundation for Statistical Computing. https://www.R-project.org/

Wagenmakers, E.-J., Lodewyckx, T., Kuriyal, H., & Grasman, R. (2010). Bayesian hypothesis testing for psychologists: A tutorial on the Savage–Dickey method. *Cognitive Psychology*, *60*(3), 158–189. https://doi.org/10.1016/j.cogpsych.2009.12.001
